# Supplementary material
Source: ML conference proceedings conference paper supplement (https://openreview.net/forum?id=nycUC9g6IO)
Supplement: supplementary_material [file attachment]

# Benchmarking In-the-Wild Multimodal Plant Disease Recognition and A Versatile Baseline

Anonymous Authors

## APPENDIX

### 1 IMAGE SAMPLES

We present exemplars of images in PlantVillage [4], PlantDoc [8] and our curated PlantWild dataset, as shown in Figure 1. PlantVillage is composed of laboratory images with controlled background and lighting conditions. PlantDoc consists of plant disease images captured from in-the-wild environments, but it falls short in scale. In contrast, PlantWild contains in-the-wild images and includes a significantly broader range of classes compared to existing plant disease datasets.

### 2 DETAILED STATISTICS OF PLANTWILD

PlantWild consists of 18,542 images across 89 classes. The class with the most images includes 589 images and the class with the fewest images includes 44 images. The detailed statistics of PlantWild are shown in Table 2, including all class names and the number of images in each class.

### 3 DESCRIPTIVE PROMPTS GENERATION

Figure 2 illustrates the process of prompt generation. To enhance the diversity of generated descriptive prompts for the text encoder

of CLIP [6], we design different commands as the input to GPT-3.5 [2]. The commands are presented as follows:

- Summarize visual characteristics of [CLASS] with less than [LENGTH] words.
- How to identify [CLASS]? Answer within [LENGTH] words.
- Use less than [LENGTH] words to outline a photo of [CLASS].

[CLASS] refers to the names of corresponding classes, while [LENGTH] stands for the maximum allowable number of words for prompt generation. If [CLASS] is a disease class, we leverage two additional commands to obtain descriptions of symptoms caused by the disease in early and late stages:

- Describe the early symptoms of [CLASS] using no more than [LENGTH] words.
- Describe the late symptoms of [CLASS] using no more than [LENGTH] words.

GPT-3.5 usually generates excessively long prompts to describe the characteristics of plant diseases in detail. CLIP may encounter difficulties in extracting useful information from excessively long sentences, leading to a decline in classification performance. Therefore, it is necessary to limit the length of generated prompts. In particular, we set the length limitation [LENGTH] at 25 words.

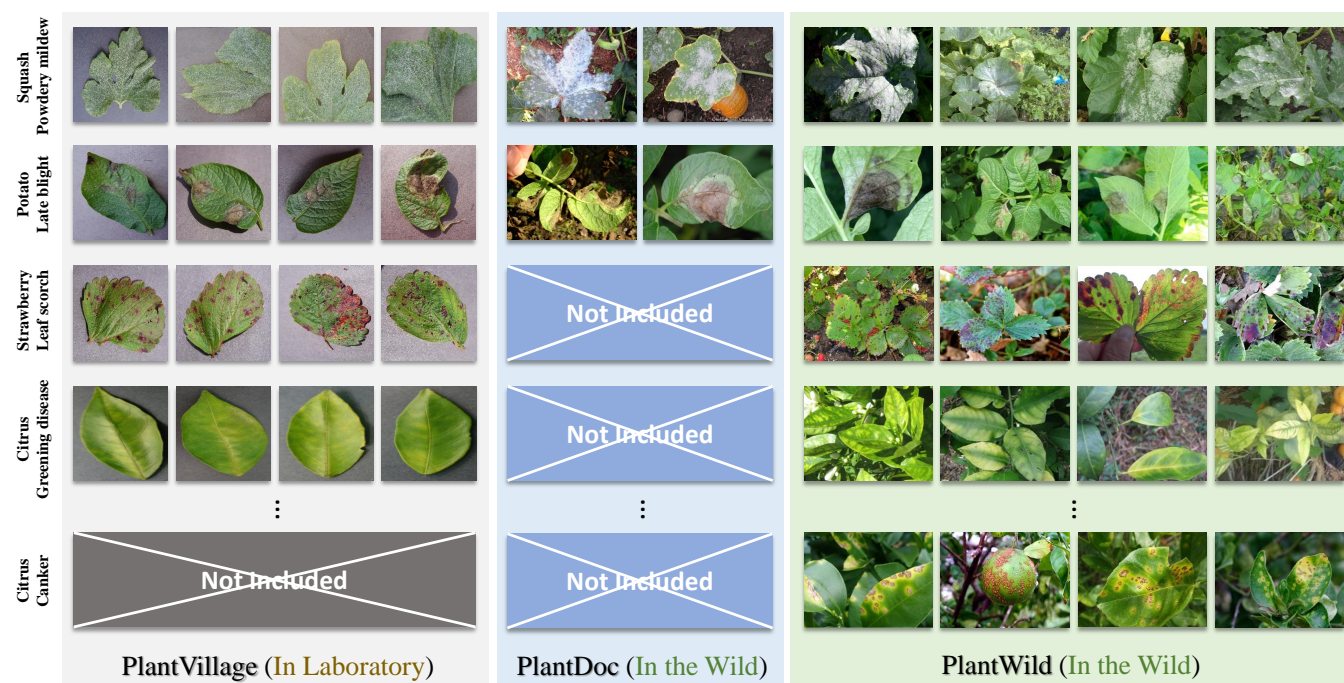

Figure 1: Comparisons of our curated dataset PlantWild and existing PlantVillage and PlantDoc. PlantWild consists of in-the-wild images and contains the largest number of disease classes.

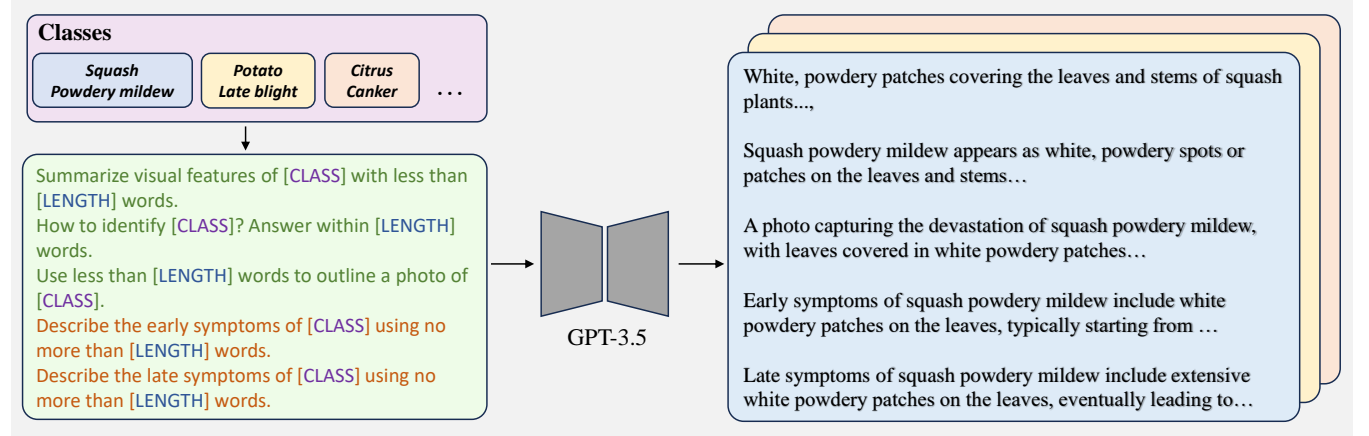

**Figure 2: The generation process of textual prompts for each class in PlantWild. For healthy classes, we leverage three commands as inputs to GPT-3.5 for generation. For disease classes, we utilize two additional commands to obtain symptom descriptions at different periods. We set a length limitation as 25 for generated prompts.**

| Methods                      | <i>PlantVillage</i> |              |              |              | <i>PlantDoc</i> |              |              |              | <i>PlantWild</i> |              |              |              |
|------------------------------|---------------------|--------------|--------------|--------------|-----------------|--------------|--------------|--------------|------------------|--------------|--------------|--------------|
|                              | Acc                 | M-P          | M-R          | M-F1         | Acc             | M-P          | M-R          | M-F1         | Acc              | M-P          | M-R          | M-F1         |
| AgglomerativeClustering [11] | 97.66               | 97.18        | <b>96.55</b> | 96.77        | 68.51           | 67.29        | 67.13        | 66.34        | 66.41            | <b>64.63</b> | 62.90        | 62.92        |
| SpectralClustering [7]       | 97.70               | 97.34        | 96.42        | 96.81        | 68.32           | 67.16        | 66.90        | 66.34        | 66.44            | 64.09        | 62.78        | 63.05        |
| Bi K-means [9]               | 97.44               | 97.13        | 96.16        | 96.51        | 69.31           | 67.92        | 67.98        | 66.47        | 66.58            | 63.15        | 62.04        | 61.80        |
| BIRCH [12]                   | 97.17               | 96.80        | 95.69        | 96.02        | 69.70           | 69.31        | 68.46        | 66.47        | 66.79            | 64.03        | 63.12        | 63.05        |
| OPTICS [1]                   | 97.14               | 96.89        | 95.08        | 95.70        | 68.71           | 67.45        | 67.72        | 67.15        | 66.82            | 64.01        | <b>63.35</b> | <b>63.24</b> |
| MeanShift [3]                | 97.29               | 96.91        | 95.68        | 96.16        | 68.91           | 67.93        | 97.75        | 66.27        | 66.88            | 64.03        | 63.12        | 63.05        |
| K-means [5]                  | <b>97.72</b>        | <b>97.40</b> | 96.44        | <b>96.83</b> | <b>69.90</b>    | <b>69.92</b> | <b>68.97</b> | <b>68.87</b> | <b>67.20</b>     | 64.03        | 62.64        | 62.84        |

**Table 1: Classification results of our proposed baseline MVPDR with various grouping techniques. Our baseline demonstrates strong robustness across different grouping techniques and achieves the best overall performance with K-means.**

## 4 FALIURE CASE ANALYSIS

We investigate the failure cases of our proposed MVPDR where images are misclassified. Figure 3 illustrates some representative failure cases. Failure case 1 in Figure 3 (Left) illustrates that mild symptoms of cucumber powdery mildew may not be prominent enough to clearly distinguish it from healthy cucumber leaf, resulting in misclassification. Different diseases with similar characteristic presentations can also raise difficulties for classification, see failure case 2 in Figure 3 (Middle). In addition, according to Figure 3 (Right), for citrus canker that can occur on leaves and fruit, we observe that all images of diseased fruit are correctly identified while some diseased leaves are misclassified.

## 5 CONFUSION MATRIXES OF MVPDR AND DHBP

To get further insights from the classification results, we generate confusion matrixes based on the results of MVPDR on PlantVillage, PlantDoc and PlantWild. According to the results in Figure 4, PlantWild is more challenging than other datasets for classification tasks. In addition, we also produce confusion matrixes for the second best-performing competing method DHBP [10], as shown in Figure 5. Comparing Figure 4 and Figure 5, it can be observed that

DHBP has superiority on PlantVillage while MVPDR shows better performance on PlantDoc and PlantWild datasets.

## 6 MVPDR WITH DIFFERENT GROUPING TECHNIQUES

We explore the influence of different grouping techniques in our baseline MVPDR. We utilize K-means [5], Bi K-means [9], MeanShift [3], BIRCH [12], Agglomerative Clustering [11], Spectral Clustering [7] and OPTICS [1] for visual prototype construction, then evaluate the classification performance.

Specifically, for partition-based clustering methods such as K-means and Spectral Clustering that need to know how many clusters the data should be divided into, we follow the main experiment setups and specify the number of clusters to 16. In contrast, hierarchical clustering and density-based clustering methods such as MeanShift and OPTICS do not need to specify the number of clusters beforehand, as these methods can automatically determine the number of clusters based on data point densities or distances. According to the results in Table 1, MVPDR is robust across different grouping techniques. By leveraging K-Means, MVPDR achieves the highest accuracy on PlantWild and the best overall performance on all three datasets.

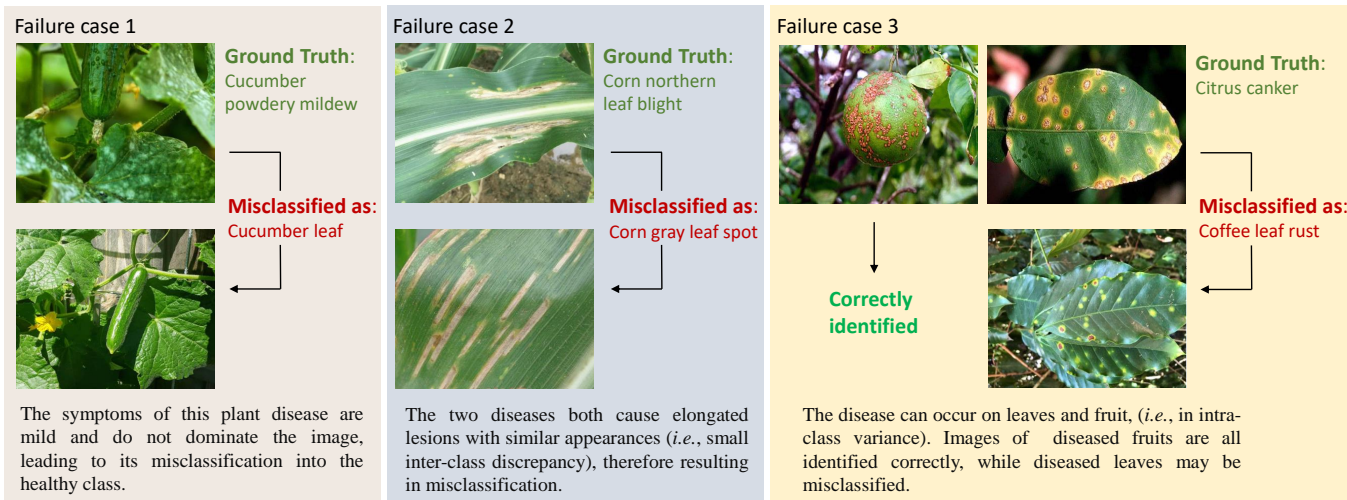

Figure 3: Illustrations of some representative failure cases of our proposed baseline.

REFERENCES

[1] Mihael Ankerst, M Breunig, Hans-Peter Kriegel, R Ng, and J Sander. 2008. Ordering points to identify the clustering structure. In *Proc. ACM SIGMOD*.

[2] Tom Brown, Benjamin Mann, Nick Ryder, Melanie Subbiah, Jared D Kaplan, Prafulla Dhariwal, Arvind Neelakantan, Pranav Shyam, Girish Sastry, Amanda Askell, et al. 2020. Language models are few-shot learners. *Advances in neural information processing systems* 33 (2020), 1877–1901.

[3] Keinosuke Fukunaga and Larry Hostetler. 1975. The estimation of the gradient of a density function, with applications in pattern recognition. *IEEE Transactions on information theory* (1975), 32–40.

[4] David Hughes, Marcel Salathé, et al. 2015. An open access repository of images on plant health to enable the development of mobile disease diagnostics. *arXiv preprint arXiv:1511.08060* (2015).

[5] James MacQueen et al. 1967. Some methods for classification and analysis of multivariate observations. In *Proceedings of the fifth Berkeley symposium on mathematical statistics and probability*. 281–297.

[6] Alec Radford, Jong Wook Kim, Chris Hallacy, Aditya Ramesh, Gabriel Goh, Sandhini Agarwal, Girish Sastry, Amanda Askell, Pamela Mishkin, Jack Clark,

et al. 2021. Learning transferable visual models from natural language supervision. In *International conference on machine learning*. 8748–8763.

[7] Jianbo Shi and Jitendra Malik. 2000. Normalized cuts and image segmentation. *IEEE Transactions on pattern analysis and machine intelligence* (2000), 888–905.

[8] Davinder Singh, Naman Jain, Pranjali Jain, Pratik Kayal, Sudhakar Kumawat, and Nipun Batra. 2020. PlantDoc: A dataset for visual plant disease detection. In *Proceedings of the 7th ACM IKDD CoDS and 25th COMAD*. 249–253.

[9] Michael Steinbach, George Karypis, and Vipin Kumar. 2000. A comparison of document clustering techniques. (2000).

[10] Dongfang Wang, Jun Wang, Zhuang Ren, and Wenrui Li. 2022. DHBP: A dual-stream hierarchical bilinear pooling model for plant disease multi-task classification. *Computers and Electronics in Agriculture* (2022), 106788.

[11] Joe H Ward Jr. 1963. Hierarchical grouping to optimize an objective function. *Journal of the American statistical association* (1963), 236–244.

[12] Tian Zhang, Raghu Ramakrishnan, and Miron Livny. 1996. BIRCH: an efficient data clustering method for very large databases. *ACM sigmod record* (1996), 103–114.

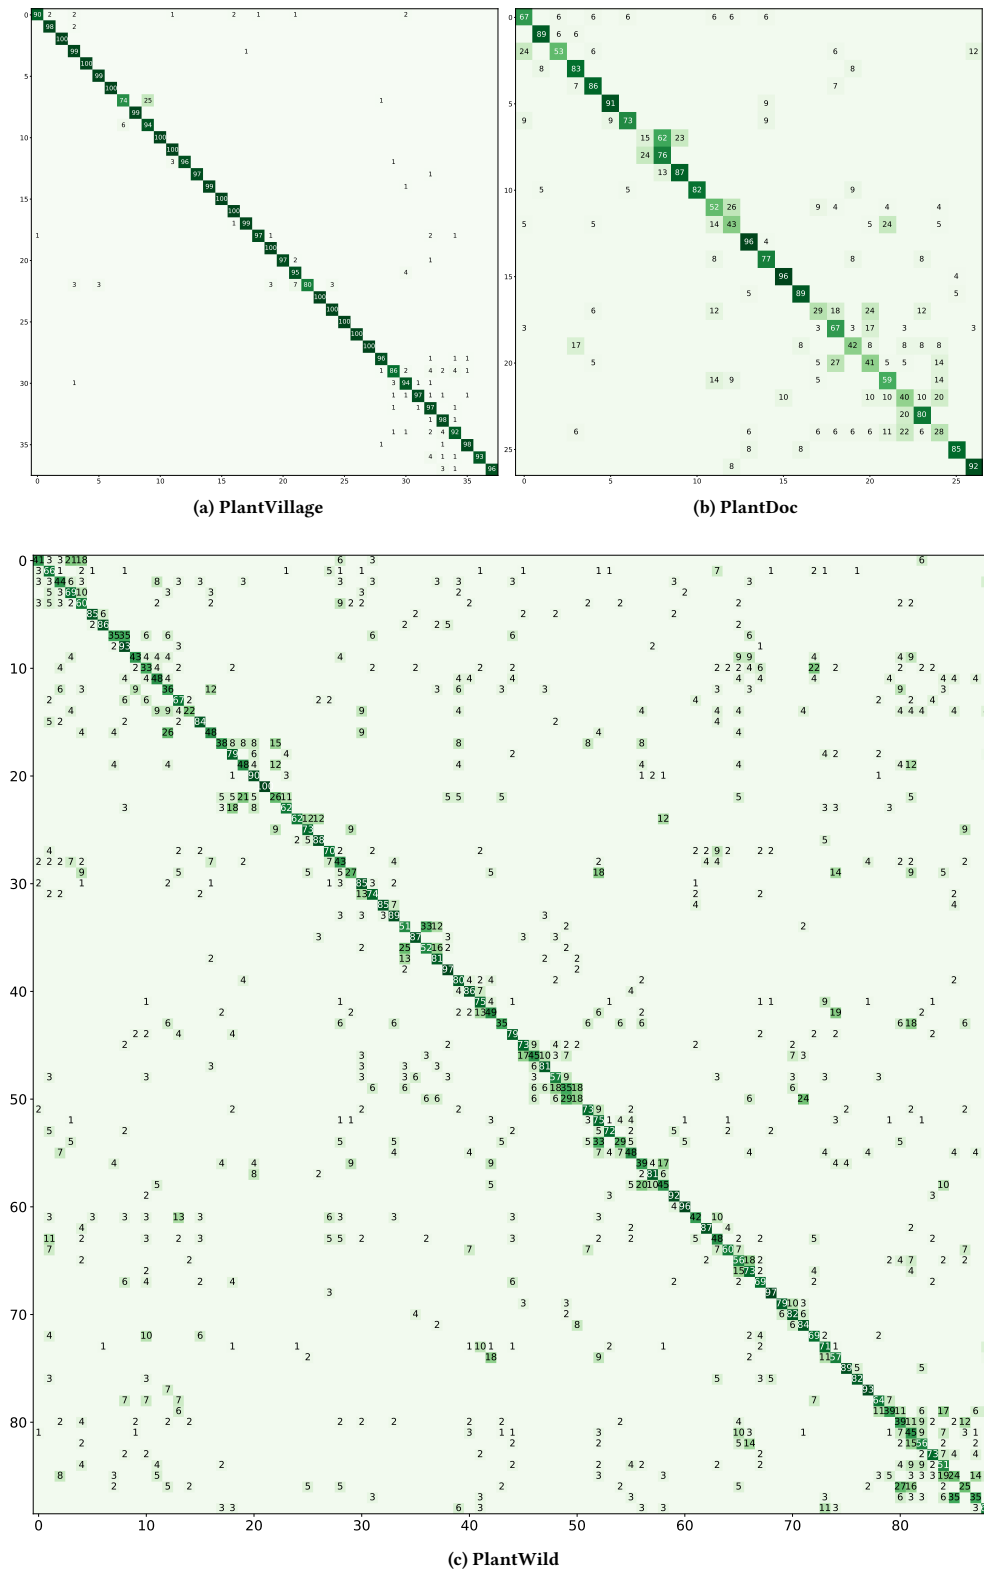

**Figure 4: Confusion matrix results of MVPDR on PlantVillage, PlantDoc and PlantWild. The value in each grid represents a percentage. It illustrates that PlantWild is more challenging than other datasets for classification tasks.**

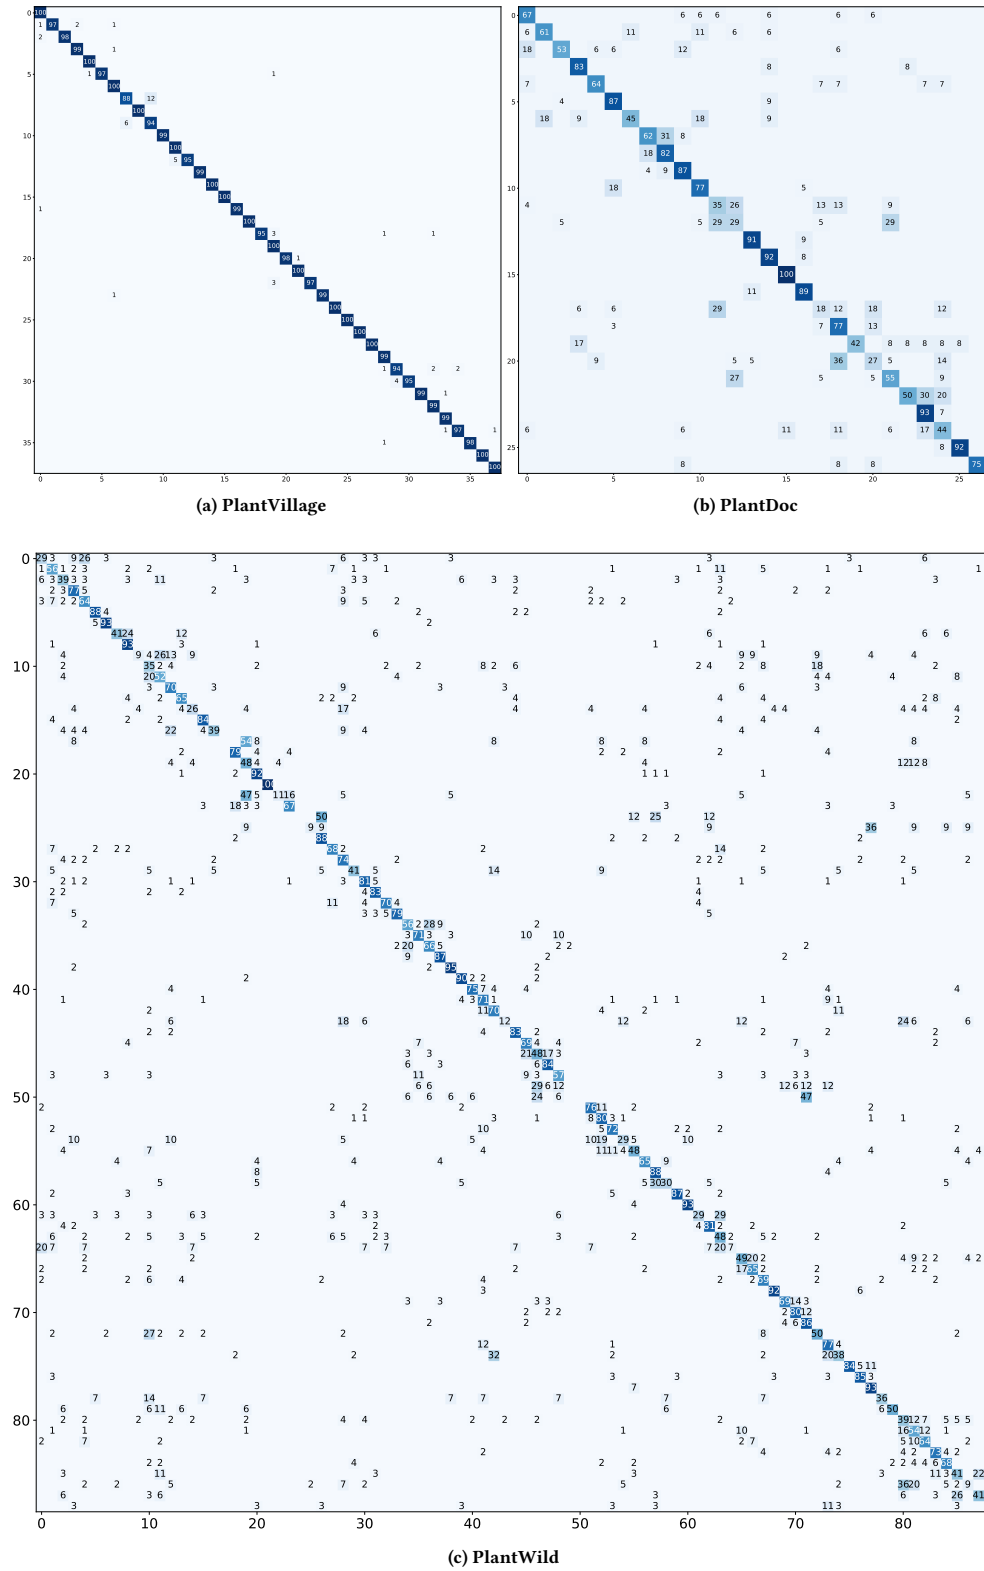

Figure 5: Confusion matrix results of DHBP [10] on PlantVillage, PlantDoc and PlantWild. The value in each grid represents a percentage.



| Class name                          | #Images | Class name                       | #Images | Class name                       | #Images |
|-------------------------------------|---------|----------------------------------|---------|----------------------------------|---------|
| 1.apple black rot                   | 173     | 31.citrus canker                 | 535     | 61.maple tar spot                | 139     |
| 2.apple leaf                        | 444     | 32.citrus greening disease       | 237     | 62.peach leaf                    | 157     |
| 3.apple mosaic virus                | 181     | 33.coffee leaf                   | 138     | 63.peach leaf curl               | 235     |
| 4.apple rust                        | 308     | 34.coffee leaf rust              | 190     | 64.plum leaf                     | 325     |
| 5.apple scab                        | 292     | 35.corn gray leaf spot           | 216     | 65.plum pocket disease           | 76      |
| 6.banana leaf                       | 243     | 36.corn leaf                     | 156     | 66.potato early blight           | 227     |
| 7.banana panama disease             | 216     | 37.corn northern leaf blight     | 224     | 67.potato late blight            | 240     |
| 8.basil downy mildew                | 86      | 38.corn rust                     | 237     | 68.potato leaf                   | 249     |
| 9.basil leaf                        | 589     | 39.corn smut                     | 293     | 69.raspberry leaf                | 180     |
| 10.bean halo blight                 | 115     | 40.cucumber angular leaf spot    | 251     | 70.rice blast                    | 148     |
| 11.bean leaf                        | 258     | 41.cucumber bacterial wilt       | 143     | 71.rice leaf                     | 252     |
| 12.bean mosaic virus                | 125     | 42.cucumber leaf                 | 348     | 72.rice sheath blight            | 250     |
| 13.bean rust                        | 165     | 43.cucumber powdery mildew       | 236     | 73.soybean leaf                  | 242     |
| 14.bell pepper leaf                 | 240     | 44.eggplant cercospora leaf spot | 88      | 74.squash leaf                   | 410     |
| 15.bell pepper bacteria leaf spot   | 117     | 45.eggplant leaf                 | 240     | 75.squash powdery mildew         | 281     |
| 16.blueberry leaf                   | 281     | 46.garlic leaf                   | 228     | 76.strawberry anthracnose        | 98      |
| 17.blueberry rust                   | 117     | 47.garlic leaf blight            | 147     | 77.strawberry leaf               | 199     |
| 18.broccoli downy mildew            | 65      | 48.garlic rust                   | 160     | 78.strawberry leaf scorch        | 76      |
| 19.broccoli leaf                    | 269     | 49.ginger leaf                   | 177     | 79.tobacco leaf                  | 71      |
| 20.cabbage alternaria leaf spot     | 128     | 50.ginger leaf spot              | 87      | 80.tobacco mosaic virus          | 91      |
| 21.cabbage leaf                     | 464     | 51.ginger sheath blight          | 87      | 81.tomato bacterial leaf spot    | 280     |
| 22.carrot cavity spot               | 74      | 52.grape black rot               | 229     | 82.tomato early blight           | 346     |
| 23.cauliflower alternaria leaf spot | 98      | 53.grape downy mildew            | 395     | 83.tomato late blight            | 295     |
| 24.cauliflower leaf                 | 195     | 54.grape leaf                    | 201     | 84.tomato leaf                   | 226     |
| 25.celery anthracnose               | 44      | 55.grape leaf spot               | 106     | 85.tomato leaf mold              | 239     |
| 26.celery early blight              | 55      | 56.grapevine leafroll disease    | 138     | 86.tomato mosaic virus           | 189     |
| 27.celery leaf                      | 212     | 57.lettuce downy mildew          | 118     | 87.tomato septoria leaf spot     | 220     |
| 28.cherry leaf                      | 286     | 58.lettuce leaf                  | 244     | 88.tomato yellow leaf curl virus | 171     |
| 29.cherry leaf spot                 | 230     | 59.lettuce mosaic virus          | 100     | 89.zucchini yellow mosaic virus  | 181     |
| 30.cherry powdery mildew            | 114     | 60.maple leaf                    | 316     | Total                            | 18542   |

**Table 2: The number of images in each class of PlantWild. Our PlantWild dataset contains a significantly larger number of classes compared to PlantVillage and PlantDoc.**
